# Supplementary material for: Acute Effects of Ketamine Infusion on Postoperative Mood Scores in Patients Undergoing Dilation and Curettage: A Randomized Double-Blind Controlled Study
Source: Hindawi journal article supplement (doi:10.1155/2021/6674658), 2021-03-23
Supplement: f1 [file 6674658.f1.zip]

# Pan African Clinical Trials Registry

South African Medical Research Council, South African Cochrane Centre  
PO Box 19070, Tygerberg, 7505, South Africa  
Telephone: +27 21 938 0506 / +27 21 938 0834 Fax: +27 21 938 0836  
Email: pactradmin@mrc.ac.za Website: www.pactr.org

**Trial #: PACTR201907779292947**

**Date of Approval:** 16/07/2019 **Trial Status:** Registered in accordance with WHO and ICMJE standards

## TRIAL DESCRIPTION

|                                                                            |                                                                                                                                                                                                                                                                                                                                                                                                                                                                                                                                                                                                                                                                                                                                                                                                                                                                                                                                                                                                                                                                                                                                                                                                                                                                                                                                                                                                                                                                                                                                                                                                                                                                                                                                                                                                                                                                                                                                                                                                                                                                                                                                                                                                                                                  |
|----------------------------------------------------------------------------|--------------------------------------------------------------------------------------------------------------------------------------------------------------------------------------------------------------------------------------------------------------------------------------------------------------------------------------------------------------------------------------------------------------------------------------------------------------------------------------------------------------------------------------------------------------------------------------------------------------------------------------------------------------------------------------------------------------------------------------------------------------------------------------------------------------------------------------------------------------------------------------------------------------------------------------------------------------------------------------------------------------------------------------------------------------------------------------------------------------------------------------------------------------------------------------------------------------------------------------------------------------------------------------------------------------------------------------------------------------------------------------------------------------------------------------------------------------------------------------------------------------------------------------------------------------------------------------------------------------------------------------------------------------------------------------------------------------------------------------------------------------------------------------------------------------------------------------------------------------------------------------------------------------------------------------------------------------------------------------------------------------------------------------------------------------------------------------------------------------------------------------------------------------------------------------------------------------------------------------------------|
| <b>Public title</b>                                                        | Effect of ketamine infusion on postoperative mood scores in patients undergoing D&C. A randomized double blinded controlled study                                                                                                                                                                                                                                                                                                                                                                                                                                                                                                                                                                                                                                                                                                                                                                                                                                                                                                                                                                                                                                                                                                                                                                                                                                                                                                                                                                                                                                                                                                                                                                                                                                                                                                                                                                                                                                                                                                                                                                                                                                                                                                                |
| <b>Official scientific title</b>                                           | Effect of ketamine infusion on postoperative mood scores in patients undergoing D&C. A randomized double blinded controlled study                                                                                                                                                                                                                                                                                                                                                                                                                                                                                                                                                                                                                                                                                                                                                                                                                                                                                                                                                                                                                                                                                                                                                                                                                                                                                                                                                                                                                                                                                                                                                                                                                                                                                                                                                                                                                                                                                                                                                                                                                                                                                                                |
| <b>Brief summary describing the background and objectives of the trial</b> | Emotional and psychological effects following abortion are more common than physical side effects and can range from mild regret to more serious complications such as depression. Research published in 2011 concluded that there was a "moderate to highly increased risk of mental health problems after abortion." The researchers suggested that undergoing a termination increased the risk by 81 percent and attributed 10 percent of this risk to the termination itself. Women with a higher probability of having a negative emotional or psychological side effect include: Individuals who obtain an abortion in the later stages of pregnancy, Individuals without support from significant others or their partner, Women obtaining an abortion for genetic or fetal abnormalities [1] The Profile of Mood States (POMS) is a psychological rating scale published in 1971 used to assess transient, distinct mood states. This scale was developed by McNair, Droppleman, and Lorr [2]. The first edition of the Profile of Mood States scale is known as the POMS-Standard version or the POMS-long form. Multiple short versions were published later after rigorous validation processes. Advantages of using this assessment include the simplicity of administration and ease of participant understanding. POMS test allowed both positive and negative states to be measured and observed in a clinical setting. Furthermore, it may be used to measure the effectiveness of treatments such as, various psychotropic drug treatments. [3] Recent studies suggest that a single low-dose administration of ketamine can provide within a few minutes of its initiation a long-lasting effect on mood [4]. Ketamine has emerged as a rapid powerful antidepressant and anxiolytic with enduring effects that last a week after a single subanaesthetic dose in the range of 0.3 to 0.5mg/kg however, its underlying mechanisms are not clear [5] Interestingly, the half-life of ketamine is only 3 h, suggesting that its antidepressant effect is unrelated to continuous blocking of N-methyl-d-aspartate (NMDA) receptors; instead, ketamine may mediate synaptic plasticity to cause long-term behavioral changes [6]. |
| <b>Type of trial</b>                                                       | RCT                                                                                                                                                                                                                                                                                                                                                                                                                                                                                                                                                                                                                                                                                                                                                                                                                                                                                                                                                                                                                                                                                                                                                                                                                                                                                                                                                                                                                                                                                                                                                                                                                                                                                                                                                                                                                                                                                                                                                                                                                                                                                                                                                                                                                                              |
| <b>Acronym (If the trial has an acronym then please provide)</b>           |                                                                                                                                                                                                                                                                                                                                                                                                                                                                                                                                                                                                                                                                                                                                                                                                                                                                                                                                                                                                                                                                                                                                                                                                                                                                                                                                                                                                                                                                                                                                                                                                                                                                                                                                                                                                                                                                                                                                                                                                                                                                                                                                                                                                                                                  |
| <b>Disease(s) or condition(s) being studied</b>                            | Anaesthesia,Mental and Behavioural Disorders,Nervous System Diseases                                                                                                                                                                                                                                                                                                                                                                                                                                                                                                                                                                                                                                                                                                                                                                                                                                                                                                                                                                                                                                                                                                                                                                                                                                                                                                                                                                                                                                                                                                                                                                                                                                                                                                                                                                                                                                                                                                                                                                                                                                                                                                                                                                             |
| <b>Sub-Disease(s) or condition(s) being studied</b>                        |                                                                                                                                                                                                                                                                                                                                                                                                                                                                                                                                                                                                                                                                                                                                                                                                                                                                                                                                                                                                                                                                                                                                                                                                                                                                                                                                                                                                                                                                                                                                                                                                                                                                                                                                                                                                                                                                                                                                                                                                                                                                                                                                                                                                                                                  |
| <b>Purpose of the trial</b>                                                | Prevention                                                                                                                                                                                                                                                                                                                                                                                                                                                                                                                                                                                                                                                                                                                                                                                                                                                                                                                                                                                                                                                                                                                                                                                                                                                                                                                                                                                                                                                                                                                                                                                                                                                                                                                                                                                                                                                                                                                                                                                                                                                                                                                                                                                                                                       |
| <b>Anticipated trial start date</b>                                        | 19/07/2019                                                                                                                                                                                                                                                                                                                                                                                                                                                                                                                                                                                                                                                                                                                                                                                                                                                                                                                                                                                                                                                                                                                                                                                                                                                                                                                                                                                                                                                                                                                                                                                                                                                                                                                                                                                                                                                                                                                                                                                                                                                                                                                                                                                                                                       |
| <b>Actual trial start date</b>                                             | 20/07/2019                                                                                                                                                                                                                                                                                                                                                                                                                                                                                                                                                                                                                                                                                                                                                                                                                                                                                                                                                                                                                                                                                                                                                                                                                                                                                                                                                                                                                                                                                                                                                                                                                                                                                                                                                                                                                                                                                                                                                                                                                                                                                                                                                                                                                                       |
| <b>Anticipated date of last follow up</b>                                  | 31/08/2020                                                                                                                                                                                                                                                                                                                                                                                                                                                                                                                                                                                                                                                                                                                                                                                                                                                                                                                                                                                                                                                                                                                                                                                                                                                                                                                                                                                                                                                                                                                                                                                                                                                                                                                                                                                                                                                                                                                                                                                                                                                                                                                                                                                                                                       |
| <b>Actual Last follow-up date</b>                                          | 31/08/2020                                                                                                                                                                                                                                                                                                                                                                                                                                                                                                                                                                                                                                                                                                                                                                                                                                                                                                                                                                                                                                                                                                                                                                                                                                                                                                                                                                                                                                                                                                                                                                                                                                                                                                                                                                                                                                                                                                                                                                                                                                                                                                                                                                                                                                       |
| <b>Anticipated target sample size (number of participants)</b>             | 60                                                                                                                                                                                                                                                                                                                                                                                                                                                                                                                                                                                                                                                                                                                                                                                                                                                                                                                                                                                                                                                                                                                                                                                                                                                                                                                                                                                                                                                                                                                                                                                                                                                                                                                                                                                                                                                                                                                                                                                                                                                                                                                                                                                                                                               |
| <b>Actual target sample size (number of participants)</b>                  | 60                                                                                                                                                                                                                                                                                                                                                                                                                                                                                                                                                                                                                                                                                                                                                                                                                                                                                                                                                                                                                                                                                                                                                                                                                                                                                                                                                                                                                                                                                                                                                                                                                                                                                                                                                                                                                                                                                                                                                                                                                                                                                                                                                                                                                                               |
| <b>Recruitment status</b>                                                  | Completed                                                                                                                                                                                                                                                                                                                                                                                                                                                                                                                                                                                                                                                                                                                                                                                                                                                                                                                                                                                                                                                                                                                                                                                                                                                                                                                                                                                                                                                                                                                                                                                                                                                                                                                                                                                                                                                                                                                                                                                                                                                                                                                                                                                                                                        |
| <b>Publication URL</b>                                                     |                                                                                                                                                                                                                                                                                                                                                                                                                                                                                                                                                                                                                                                                                                                                                                                                                                                                                                                                                                                                                                                                                                                                                                                                                                                                                                                                                                                                                                                                                                                                                                                                                                                                                                                                                                                                                                                                                                                                                                                                                                                                                                                                                                                                                                                  |

**Secondary Ids** **Issuing authority/Trial register**

## STUDY DESIGN

| Intervention assignment | Allocation to intervention | If randomised, describe how the allocation sequence was generated | Describe how the allocation sequence/code was concealed from the person allocating the participants to the intervention arms | Masking               | If masking / blinding was used |
|-------------------------|----------------------------|-------------------------------------------------------------------|------------------------------------------------------------------------------------------------------------------------------|-----------------------|--------------------------------|
| Parallel:<br>different  | Randomised                 | Simple randomization                                              | Sealed opaque envelopes                                                                                                      | Masking/blinding used | Care giver/Provider,Outcome    |

|                                                                  |  |                                                                    |  |  |                        |
|------------------------------------------------------------------|--|--------------------------------------------------------------------|--|--|------------------------|
| groups receive different interventions at same time during study |  | using a randomization table created by a computer software program |  |  | Assessors,Participants |
|------------------------------------------------------------------|--|--------------------------------------------------------------------|--|--|------------------------|

| INTERVENTIONS      |                   |                                                                                          |            |                                                                                                                                                                                                                                                                                                                                                                                                                                                                                                                                                                                                              |            |                   |
|--------------------|-------------------|------------------------------------------------------------------------------------------|------------|--------------------------------------------------------------------------------------------------------------------------------------------------------------------------------------------------------------------------------------------------------------------------------------------------------------------------------------------------------------------------------------------------------------------------------------------------------------------------------------------------------------------------------------------------------------------------------------------------------------|------------|-------------------|
| Intervention type  | Intervention name | Dose                                                                                     | Duration   | Intervention description                                                                                                                                                                                                                                                                                                                                                                                                                                                                                                                                                                                     | Group size | Nature of control |
| Control Group      | Control Group     | Group C: patients received 50 ml normal saline over a period of 20 minutes.              | 20 minutes | The women were randomized to 2 groups: C (Control group) and K (Ketamine group) using random number tables. The assigned treatments were written on cards and sealed in secure opaque envelopes numbered in sequence. On the scheduled time of operation, the head nurse (who was not part of the study) opened each envelope just before surgery, prepared the infusion solution and handled it to the anesthesiologist who was blinded to the solution. He was then determined for collecting perioperative data. Group C: patients received 50 ml normal saline over a period of 20 minutes.              | 30         | Placebo           |
| Experimental Group | Ketamine Group    | Group K: patients received 0.4 mg/kg ketamine diluted in 50 ml normal saline over 20 min | 20 minutes | The women were randomized to 2 groups: C (Control group) and K (Ketamine group) using random number tables. The assigned treatments were written on cards and sealed in secure opaque envelopes numbered in sequence. On the scheduled time of operation, the head nurse (who was not part of the study) opened each envelope just before surgery, prepared the infusion solution and handled it to the anesthesiologist who was blinded to the solution. He was then determined for collecting perioperative data. Group K: patients received 0.4 mg/kg ketamine diluted in 50 ml normal saline over 20 min | 30         |                   |

| ELIGIBILITY CRITERIA                                                                                                                                                                                             |                                                                                                                                                                                                                                                                                                                                                                       |                                                                                       |             |             |        |
|------------------------------------------------------------------------------------------------------------------------------------------------------------------------------------------------------------------|-----------------------------------------------------------------------------------------------------------------------------------------------------------------------------------------------------------------------------------------------------------------------------------------------------------------------------------------------------------------------|---------------------------------------------------------------------------------------|-------------|-------------|--------|
| List inclusion criteria                                                                                                                                                                                          | List exclusion criteria                                                                                                                                                                                                                                                                                                                                               | Age Category                                                                          | Minimum age | Maximum age | Gender |
| 18 years or older, physical status ASA I&II, with up to 12-week gestation, submitted to manual intrauterine aspiration for incomplete or retained abortion, participated in this randomized, double blind study. | patients with infected abortion or with psychiatric disorder on chronic medical treatment. Also, patients with pulmonary, hepatorenal, neuromuscular diseases body mass index over 30 kg/m2, usage of sedative drugs or substance abuse, any contraindications to regional anesthesia and finally emergency curettage for massive bleeding or hemodynamic instability | Adolescent: 13 Year-18 Year,Adult: 19 Year-44 Year,Middle Aged: 45 Year(s)-64 Year(s) | 18 Year(s)  | 60 Year(s)  | Female |

| ETHICS APPROVAL                                              |                                               |                  |                               |
|--------------------------------------------------------------|-----------------------------------------------|------------------|-------------------------------|
| Has the study received appropriate ethics committee approval | Date the study will be submitted for approval | Date of approval | Name of the ethics committee  |
| Yes                                                          |                                               | 10/07/2019       | Research Ethics Committee REC |
| Ethics Committee Address                                     |                                               |                  |                               |
| Street address                                               | City                                          | Postal code      | Country                       |
| Abbasia                                                      | Cairo                                         | 11591            | Egypt                         |

| OUTCOMES          |                                                                                                                                                                                                                                                                                                                                                                                                                                                                                                                                                                                                                                                                                 |                                        |
|-------------------|---------------------------------------------------------------------------------------------------------------------------------------------------------------------------------------------------------------------------------------------------------------------------------------------------------------------------------------------------------------------------------------------------------------------------------------------------------------------------------------------------------------------------------------------------------------------------------------------------------------------------------------------------------------------------------|----------------------------------------|
| Type of outcome   | Outcome                                                                                                                                                                                                                                                                                                                                                                                                                                                                                                                                                                                                                                                                         | Timepoint(s) at which outcome measured |
| Primary Outcome   | Our primary outcome is mood changes which were assessed preoperatively and 2 h postoperatively with POMS-A to determine if there were differences in mood state that could be attributed to the interventional drug infused.                                                                                                                                                                                                                                                                                                                                                                                                                                                    | preoperatively and 2 h postoperatively |
| Secondary Outcome | Secondary outcomes were: 1. Mean blood pressure and heart rate were measured preoperatively then every 5 min till end of the operation. Postoperatively, mean blood pressure, heart rate, were recorded every 30 minutes for 2 hours in PACU 2. Total dose of ketamine infused. 3. The duration of surgery in minutes. 4. Presence of psychedelic phenomenon [10] intraoperatively (during infusion) and/or postoperatively. It is a temporary altered state of consciousness that might be induced by ketamine infusion. The subjective phenomenon that might be reported included one or more of the following: perceptual disorders, a sense of detachment from their bodies | preoperatively and 2 h postoperatively |

(dissociation), a sense of relaxation or well-being. Hallucinations, if occurred would be treated with injecting 2 mg intravenous midazolam. 5. Presence of intraoperative (during infusion) and/or postoperative other side effects as headache & diplopia 6. Presence of intraoperative (during infusion) and/or postoperative nausea and vomiting (PONV) which was rated on a 4-point scale (0=no PONV, 1=Mild nausea, 2=Severe nausea, 3=Vomiting). If PONV scale was 2 or more, ondansetron 4mg was given intravenously. 7. The patient satisfaction was assessed postoperatively at the 2nd hour. Patient satisfaction were rated on a scale of 1 to 4 (1=perfect, 2=good, 3=moderate, 4=bad). 8. Assessment of postoperative pain was done with the aid of visual analogue scale (VAS) in which patients were requested to estimate their pain on vertical VAS 0–10 cm where (0) is marked as no pain and (10) is marked as the worst pain ever felt. [11]. This was recorded postoperatively at specific timings: every 30 minutes for 2 hours postoperatively. 30 mg ketorolac was given intravenously if VAS score was > or equal to 4 at any of the mentioned times (with a maximum total ketorolac dose of 60 mg). 9. Assessment of perioperative sedation level using Sedation scale using University of Michigan Sedation Scale (UMSS) [12] The UMSS as a measure of sedation during procedures. The UMSS is a simple observational tool that assesses the level of alertness on a five-point scale ranging from 1 (wide awake) to 5 (unrousable with deep stimulation). Table (1) It will be assessed intraoperatively till the 2nd postoperative hour; every 30 minutes.

## RECRUITMENT CENTRES

| Name of recruitment centre    | Street address | City  | Postal code | Country |
|-------------------------------|----------------|-------|-------------|---------|
| Ain Shams University hospital | Abbaseya       | Cairo |             | Egypt   |

## FUNDING SOURCES

| Name of source                                                  | Street address | City  | Postal code | Country |
|-----------------------------------------------------------------|----------------|-------|-------------|---------|
| Ashraf Nabil Raham Hasan Mohamed Abdulmohsen Abdulnaiem Ismaiel | Abbasiya       | Cairo |             | Egypt   |

## SPONSORS

| Sponsor level   | Name                 | Street address | City  | Postal code | Country | Nature of sponsor |
|-----------------|----------------------|----------------|-------|-------------|---------|-------------------|
| Primary Sponsor | Ain Shams University | Abbasiya       | Cairo |             | Egypt   | Hospital          |

## COLLABORATORS

| Name                                   | Street address | City  | Postal code | Country |
|----------------------------------------|----------------|-------|-------------|---------|
| Ashraf Nabil Saleh                     | 5th Settlement | Cairo |             | Egypt   |
| Raham Hasan Mostafa                    | Nasr City      | Cairo |             | Egypt   |
| Mohamed Abdulmohsen Abdulnaiem Ismaiel | Heliopolis     | Cairo |             | Egypt   |

## CONTACT PEOPLE

| Role                          | Name                                   | Email                       | Phone                                       | Street address        |
|-------------------------------|----------------------------------------|-----------------------------|---------------------------------------------|-----------------------|
| <b>Principal Investigator</b> | Raham Hasan Mostafa                    | rahamhasan@yahoo.com        | 01222530020                                 | Nasr City             |
| <b>City</b>                   | <b>Postal code</b>                     | <b>Country</b>              | <b>Position/Affiliation</b>                 |                       |
| Cairo                         |                                        | Egypt                       | Assistant professor Ain Shams University    |                       |
| <b>Role</b>                   | <b>Name</b>                            | <b>Email</b>                | <b>Phone</b>                                | <b>Street address</b> |
| <b>Public Enquiries</b>       | Mohamed Abdulmohsen Abdulnaiem Ismaiel | mohamedismaiel79@gmail.com  | 01001381193                                 | Heliopoless           |
| <b>City</b>                   | <b>Postal code</b>                     | <b>Country</b>              | <b>Position/Affiliation</b>                 |                       |
| Cairo                         |                                        | Egypt                       | Lecturer of Anesthesia Ain Shams University |                       |
| <b>Role</b>                   | <b>Name</b>                            | <b>Email</b>                | <b>Phone</b>                                | <b>Street address</b> |
| <b>Scientific Enquiries</b>   | Ashraf Nabil Saleh                     | ashraf_nabel@med.asu.edu.eg | 01001100613                                 | 5th Settlement        |
| <b>City</b>                   | <b>Postal code</b>                     | <b>Country</b>              | <b>Position/Affiliation</b>                 |                       |
| Cairo                         |                                        | Egypt                       | Lecturer of Anesthesia Ain Shams University |                       |

## REPORTING

| Share IPD  | Description              | Additional Document Types | Sharing Time Frame         | Key Access Criteria                                        |
|------------|--------------------------|---------------------------|----------------------------|------------------------------------------------------------|
| Yes        | Excel Sheet              | Statistical Analysis Plan | Twelve months              | Only journal editors to whom manuscript will be applied to |
| <b>URL</b> | <b>Results Available</b> | <b>Results Summary</b>    | <b>Result Posting Date</b> | <b>First Journal Publication Date</b>                      |

|                                       |                         |                         |                         |                         |
|---------------------------------------|-------------------------|-------------------------|-------------------------|-------------------------|
| Not Available                         | No                      |                         |                         |                         |
| <b>Result Upload 1:</b>               | <b>Result Upload 2:</b> | <b>Result Upload 3:</b> | <b>Result Upload 4:</b> | <b>Result Upload 5:</b> |
| <b>Results URL Hyperlinks</b>         | <b>Link To Protocol</b> |                         |                         |                         |
| <a href="#">Result URL Hyperlinks</a> |                         |                         |                         |                         |

| Changes to trial information |                                    |            |                                               |                                                            |                                                                                                         |
|------------------------------|------------------------------------|------------|-----------------------------------------------|------------------------------------------------------------|---------------------------------------------------------------------------------------------------------|
| Section Name                 | Field Name                         | Date       | Reason                                        | Old Value                                                  | Updated Value                                                                                           |
| Eligibility                  | Age group                          | 16/07/2019 | Correction to include minimum age of 18 years | Adult: 19 Year-44 Year, Middle Aged: 45 Year(s)-64 Year(s) | Adolescent: 13 Year-18 Year, Adult: 19 Year-44 Year, Middle Aged: 45 Year(s)-64 Year(s)                 |
| Section Name                 | Field Name                         | Date       | Reason                                        | Old Value                                                  | Updated Value                                                                                           |
| Funding Source               | FundingSources List                | 16/07/2019 | As requestd by reviewers                      |                                                            | Ashraf Nabil Raham Hasan Mohamed Abdulmohsen Abdulnaiem Ismaiel, Abbasiya, Cairo, , Egypt, Self Funded, |
| Section Name                 | Field Name                         | Date       | Reason                                        | Old Value                                                  | Updated Value                                                                                           |
| Collaborators                | Collaborators List                 | 16/07/2019 | As requested by reviewers                     |                                                            | Ashraf Nabil Saleh, 5th Settlement, Cairo, , Egypt                                                      |
| Section Name                 | Field Name                         | Date       | Reason                                        | Old Value                                                  | Updated Value                                                                                           |
| Collaborators                | Collaborators List                 | 16/07/2019 | As requested by reviewers                     |                                                            | Raham Hasan Mostafa, Nasr City, Cairo, , Egypt                                                          |
| Section Name                 | Field Name                         | Date       | Reason                                        | Old Value                                                  | Updated Value                                                                                           |
| Collaborators                | Collaborators List                 | 16/07/2019 | As requested by reviewers                     |                                                            | Mohamed Abdulmohsen Abdulnaiem Ismaiel, Heliopolis, Cairo, , Egypt                                      |
| Section Name                 | Field Name                         | Date       | Reason                                        | Old Value                                                  | Updated Value                                                                                           |
| Reporting                    | Plan to share IPD                  | 16/07/2019 | As requested by reviewers                     | No                                                         | Yes                                                                                                     |
| Section Name                 | Field Name                         | Date       | Reason                                        | Old Value                                                  | Updated Value                                                                                           |
| Reporting                    | IPD description                    | 16/07/2019 | As requested by reviewers                     |                                                            | Excel Sheet                                                                                             |
| Section Name                 | Field Name                         | Date       | Reason                                        | Old Value                                                  | Updated Value                                                                                           |
| Reporting                    | IPD-Sharing time frame             | 16/07/2019 | As requested by reviewers                     |                                                            | Twelve months                                                                                           |
| Section Name                 | Field Name                         | Date       | Reason                                        | Old Value                                                  | Updated Value                                                                                           |
| Reporting                    | Key access criteria                | 16/07/2019 | As requested by reviewers                     |                                                            | Only journal editors to whom manuscript will be applied to                                              |
| Section Name                 | Field Name                         | Date       | Reason                                        | Old Value                                                  | Updated Value                                                                                           |
| Reporting                    | IPD URL                            | 16/07/2019 | As requested by reviewers                     |                                                            | Not Available                                                                                           |
| Section Name                 | Field Name                         | Date       | Reason                                        | Old Value                                                  | Updated Value                                                                                           |
| Reporting                    | Study protocol document            | 16/07/2019 | As requested by reviewers                     |                                                            | Statistical Analysis Plan                                                                               |
| Section Name                 | Field Name                         | Date       | Reason                                        | Old Value                                                  | Updated Value                                                                                           |
| Trial Information            | Anticipated date of last follow up | 31/08/2020 | Study completed                               | 30 Sep 2019                                                | 31 Aug 2020                                                                                             |
| Section Name                 | Field Name                         | Date       | Reason                                        | Old Value                                                  | Updated Value                                                                                           |
| Trial Information            | Completion date                    | 31/08/2020 | Study completed                               | 30 Sep 2019                                                | 31 Aug 2020                                                                                             |
| Section Name                 | Field Name                         | Date       | Reason                                        | Old Value                                                  | Updated Value                                                                                           |
| Trial Information            | Recruitment status                 | 31/08/2020 | Study completed                               | Not yet recruiting                                         | Completed                                                                                               |
