# Supplementary material for: Acute Effects of Ketamine Infusion on Postoperative Mood Scores in Patients Undergoing Dilation and Curettage: A Randomized Double-Blind Controlled Study
Source: Anesthesiol Res Pract. 2021 Mar 23;2021:6674658. doi: 10.1155/2021/6674658 (PMC8009713; doi:10.1155/2021/6674658)
Supplement: Supplementary Materials — Ethical approval statement: Trial ID PACTR201907779292947. Consort Check list. [file 6674658.f1.zip]

Archive with 2 entries (2 files):
- 6674658.f1/CONSORT+2010+checklist.doc
- 6674658.f1/Trial ID PACTR201907779292947.pdf
